# Supplementary material
Source: PubMed Central journal article supplement (PMC7300739)
Supplement: HEP-72-807-s001.pdf [file HEP-72-807-s001.pdf]

**Supplemental Table 1: Initial and peak ALT by SARS-CoV-2 test result using AASLD cutoffs**

|                   | SARS-CoV-2 Result    |                       |                       | p-value |
|-------------------|----------------------|-----------------------|-----------------------|---------|
|                   | Overall<br>(n= 3381) | Positive<br>(n= 2273) | Negative<br>(n= 1108) |         |
| Initial ALT (%)   |                      |                       |                       |         |
| > ULN             | 1780 (53)            | 1319 (58)             | 461 (42)              | <0.001  |
| > 2x ULN          | 720 (21)             | 526 (23)              | 194 (18)              | <0.001  |
| > 5x ULN          | 145 (4.3)            | 86 (3.8)              | 59 (5.3)              | 0.047   |
| Peak ALT (%)      |                      |                       |                       |         |
| ALT peak > ULN    | 2297 (68)            | 1719 (76)             | 578 (52)              | <0.001  |
| ALT peak > 2x ULN | 1312 (39)            | 1026 (45)             | 286 (26)              | <0.001  |
| ALT peak > 5x ULN | 470 (14)             | 365 (16)              | 105 (9.5)             | <0.001  |

Abbreviations: ALT = alanine aminotransferase; ULN = upper limit of normal
